# Supplementary material for: Development of a microwave-assisted extraction method and isotopic validation of mercury species in soils and sediments
Source: Royal Society of Chemistry journal article supplement (doi:10.1039/b404581e), 2005-01-01
Supplement: b404581e.doc [file b404581e.doc]

This journal © The Royal Society of Chemistry 2005

**Electronic Supplementary Material**

**Optimization of HNO3 Concentration**

The following figures were constructed from the data reported in Table 3. It is demonstrated in both figures that the methylmercury was extracted ~100% and ~80% from both materials studied and were stable up to 4.0 mol l-1 of HNO3. After that methylmercury converted to inorganic mercury, as a result the concentration of inorganic mercury increased with increasing concentration of HNO3.

**Figure 1.** The effects of optimization of nitric acid concentration on the efficiency of extraction and stability of mercury species for (a) spiked blank soil and (b) SRM 2711 (spiked with methylmercury).

**Optimization of Sample Weight**

The following figures were constructed from those data reported in Table 4. The results demonstrated that the sample weight has neither effect on extraction efficiency nor on stability of both mercury species.

**Figure 2**. The effects of optimization of the sample weight on extraction efficiency for (a) spiked blank soil and (b) SRM 2711 (spiked with methylmercury).

**Optimization of Irradiation Temperature**

The following figures were generated from those data reported in Table 5. It is observed that the recovery results for both inorganic mercury and methylmercury in spiked soil was ~100% and were indistinguishable throughout the temperature range studied. On the other hand, in case of SRM 2711 the extraction efficiency was increased gradually with temperature up to 100C, where both species were extracted ~100%. After the temperature the methylmercury concentration decreased because of the degradation of this species into inorganic mercury species.

**Figure 3**. The effects of optimization of the irradiation temperature on extraction efficiency and stability of mercury species in (a) spiked blank soil and (b) SRM 2711 (spiked with methylmercury).

**Optimization of Irradiation Time**

The following figures were constructed from those data reported in Table 6. From the results, it is observed that ~100% of inorganic mercury and methylmercury are extractable for both materials studied with no distinguishable degradation of mercury species. Although in SRM 2711 (spiked with methylmercury), it seems that degradation of methylmercury occurred after 20 min, but the amount of degradation was indistinguishable at their 95% confidence level.

**Figure 4**. The effects of optimization of the irradiation time on extraction efficiency and stability of mercury species in (a) spiked bland soil and (b) SRM 2711 (spiked with methylmercury).
